# Supplementary material for: Vitamin D Deficiency is Associated with Increased Disease Activity in Patients with Inflammatory Bowel Disease
Source: MDPI journal article supplement (doi:10.3390/jcm8091319), 2019-08-27
Supplement: s1 [file s1]

**Table S1.** Seasonal variations in vitamin D serum levels.

|                                          | Entire cohort              | Ulcerative colitis        | Crohn's disease            |
|------------------------------------------|----------------------------|---------------------------|----------------------------|
| <b>Winter season</b>                     |                            |                           |                            |
| <b>(i.e. Oct–Mar), <i>n</i></b>          |                            |                           |                            |
| Overall value, <i>n</i> ; median (range) | 303 patients<br>24 (3–75)  | 134 patients<br>25 (3–75) | 164 patients<br>23 (4–70)  |
| Without substitution, median (range)     | 134 patients<br>21 (3–70)  | 57 patients<br>21 (3–47)  | 77 patients<br>21 (4–70)   |
| With substitution, median (range)        | 160 patients<br>29 (4–75)  | 79 patients<br>31 (4–75)  | 81 patients<br>28 (5–64)   |
| <b>Summer season</b>                     |                            |                           |                            |
| <b>(i.e. Apr–Sep), <i>n</i></b>          |                            |                           |                            |
| Overall value, median (range)            | 167 patients<br>29 (3–100) | 59 patients<br>31 (5–100) | 108 patients<br>27 (3–76)  |
| Without substitution, median (range)     | 78 patients<br>26 (3–52)   | 29 patients<br>28 (5–52)  | 49 patients<br>26 (3–49)   |
| With substitution, median (range)        | 85 patients<br>34 (6–100)  | 29 patients<br>35 (8–100) | 56 patients<br>32.5 (6–76) |
